# Supplementary material for: Structural Characterization of Functional Ingredient Levan Synthesized by Bacillus siamensis Isolated from Traditional Fermented Food in Thailand
Source: Hindawi journal article supplement (doi:10.1155/2020/7352484), 2020-06-06
Supplement: f1 [file 7352484.f1.docx]

**Structural Characterization of Functional Ingredient Levan synthesized by *Bacillus siamensis* isolated from Traditional Fermented Food in Thailand**

Nattapong Thakham1, Supphasin Thaweesak2, Nuttinee Teerakulkittipong3, Natthiwut Traiosot4, Autaipohn Kaikaew5, Gary Antonio Lirio6, and Witawat Jangiam7

Department of Chemical Engineering National Chung Hsing University Xingda Road Taichung city 402 Taiwan1

Department of Chemical Engineering Faculty of Engineering Burapha University Saensook Maung Chonburi 20131 Thailand2

Faculty of Pharmaceutical Science Burapha University Saensook Maung Chonburi 20131 Thailand3

Bioengineering Program Faculty of Engineering Burapha University Saensook Maung Chonburi 20131 Thailand4

College of Research Methodology and Cognitive Science Burapha University Saensook Maung Chonburi 20131 Thailand5

Institute for Science and Technology Research, Center for Life Sciences Research, Polytechnic University of the Philippines Manila 1008 Philippines6

Department of Chemical Engineering, Faculty of Engineering, Burapha University, Saensook, Maung, Chonburi 20131, Thailand7

Correspondence should be addressed to Witawat Jangiam; [witawat@eng.buu.ac.th](mailto:witawat@eng.buu.ac.th)

**Supplementary Materials**


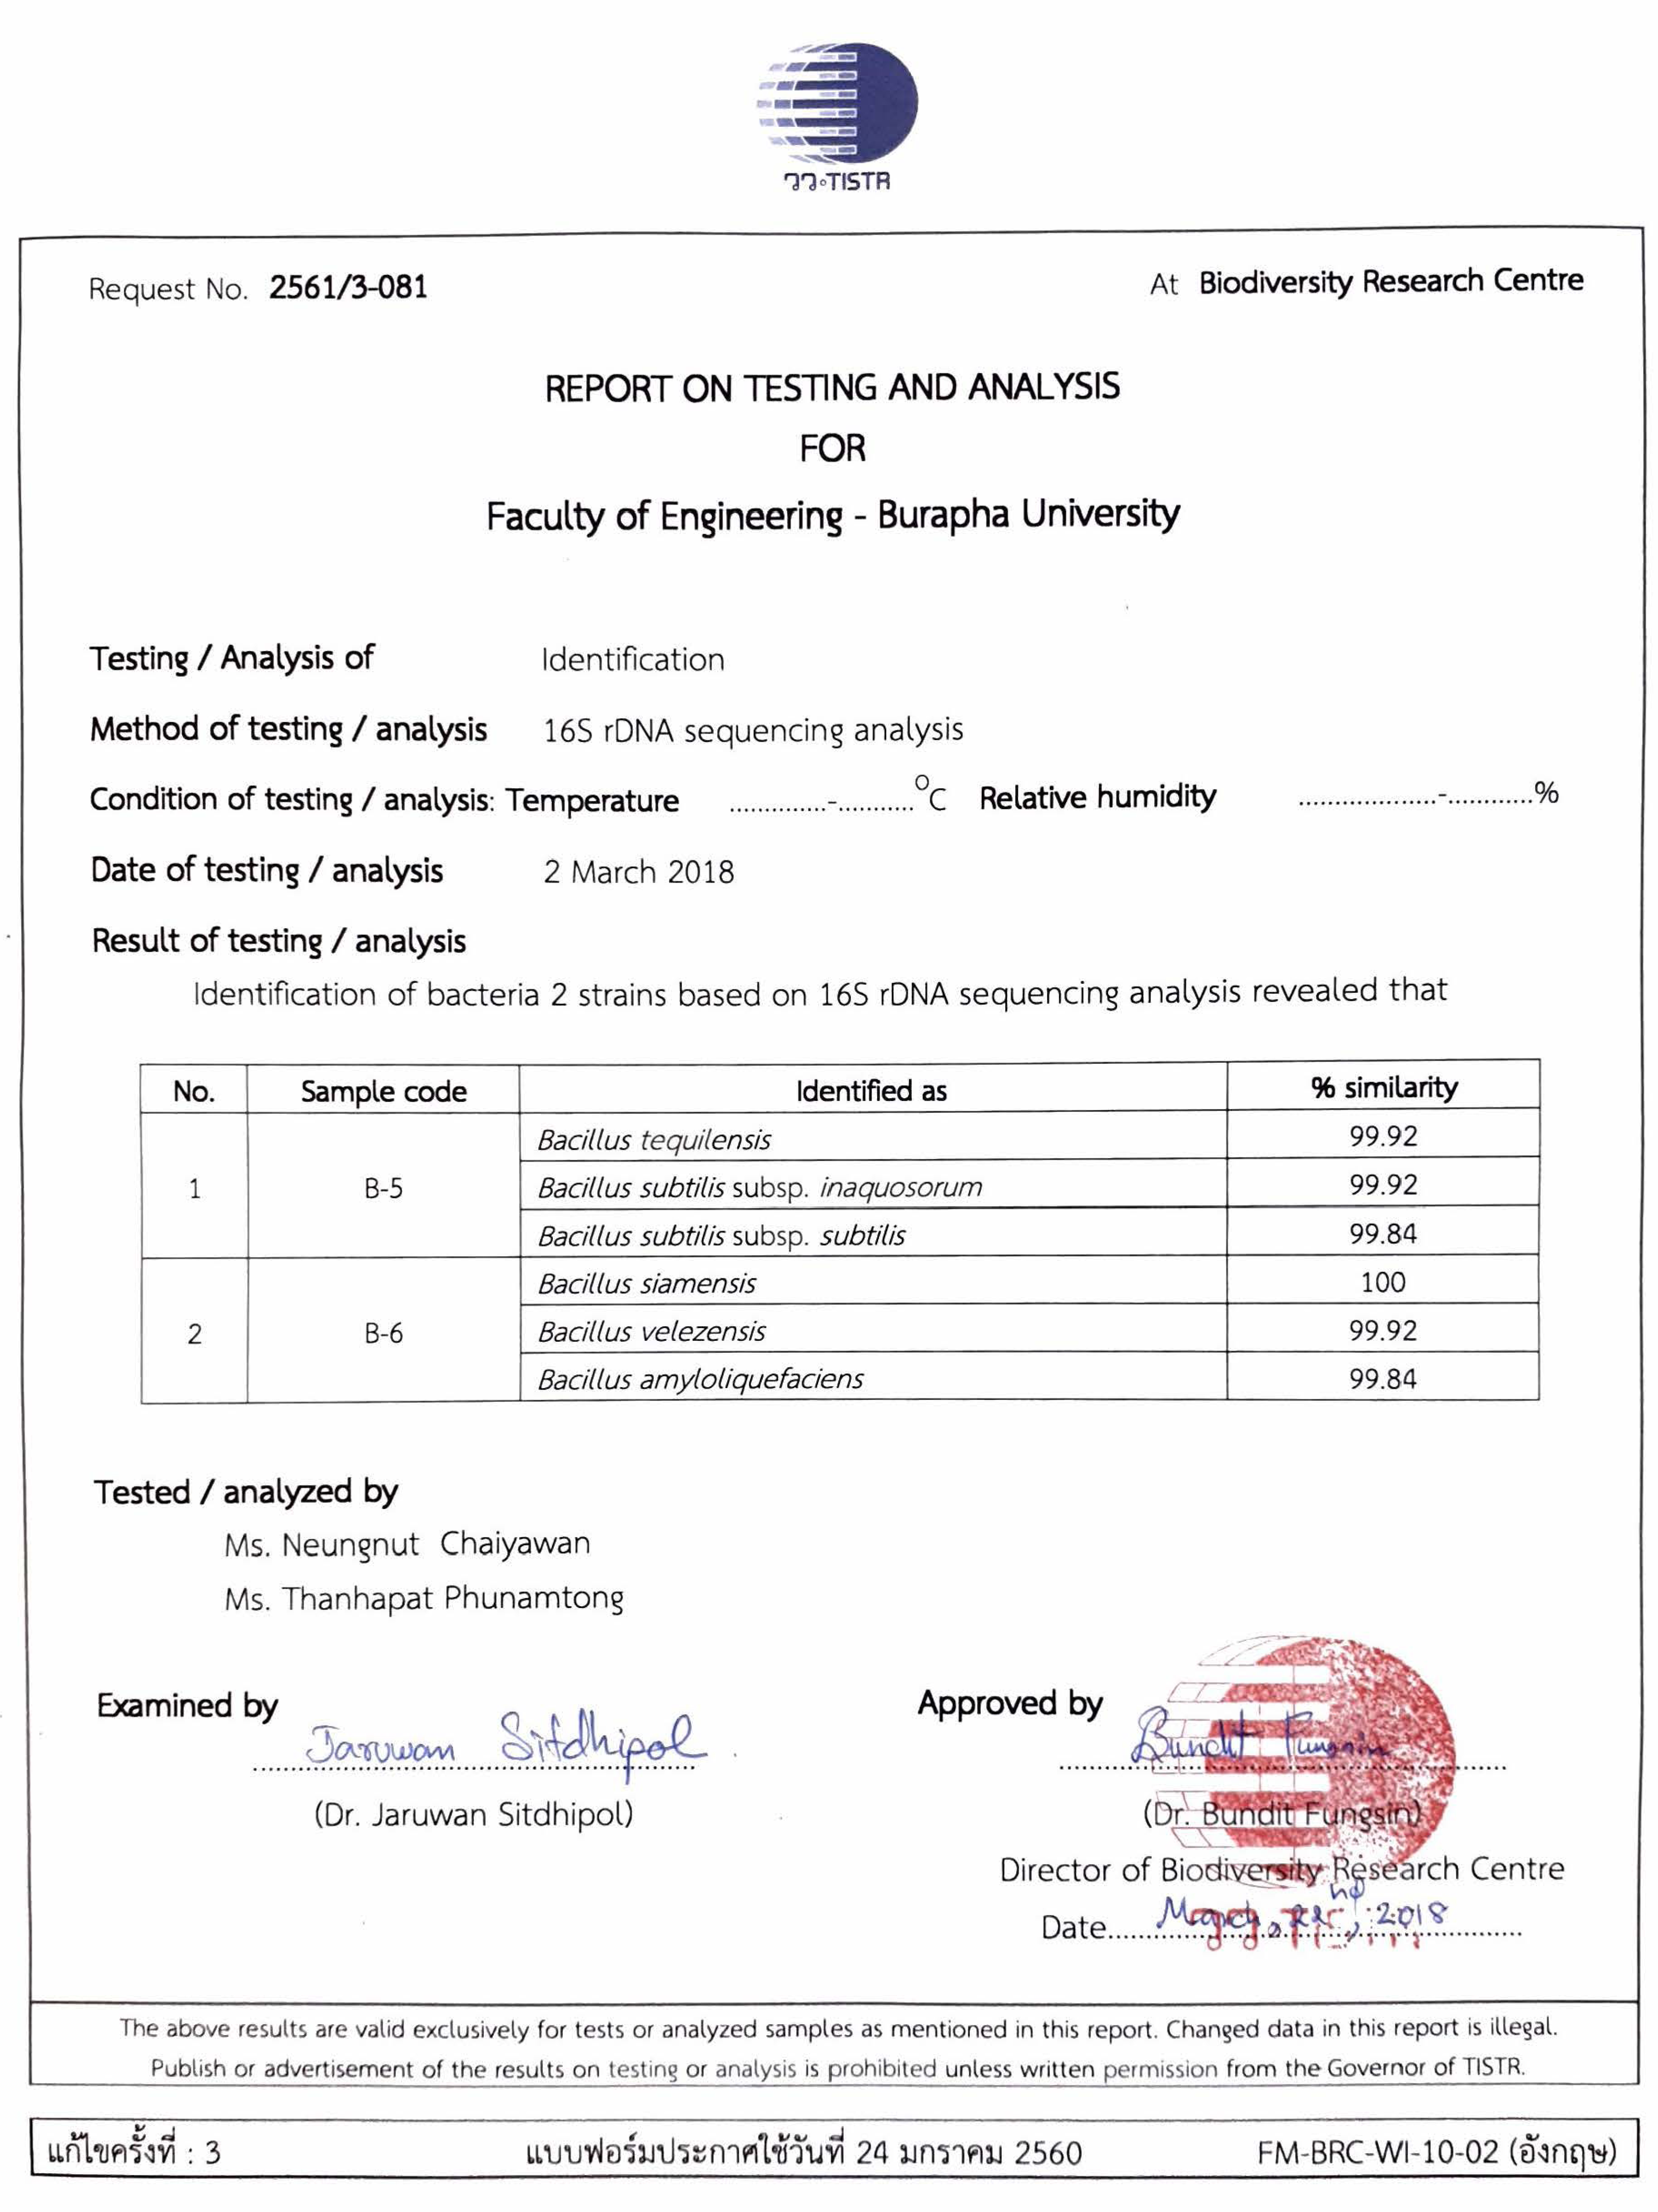


**Supplementary Figure 1.** The 16s rDNA sequencing analysis results reveal the identity of levan-sucrase producing bacterial isolate B6 as *Bacillus siamensis* NR 11274.1 based on the percent (%) similarity score of 100. Results have been generated by the Thailand Institute of Scientific and Technological Research, Biodiversity Research Center, March 2, 2018.


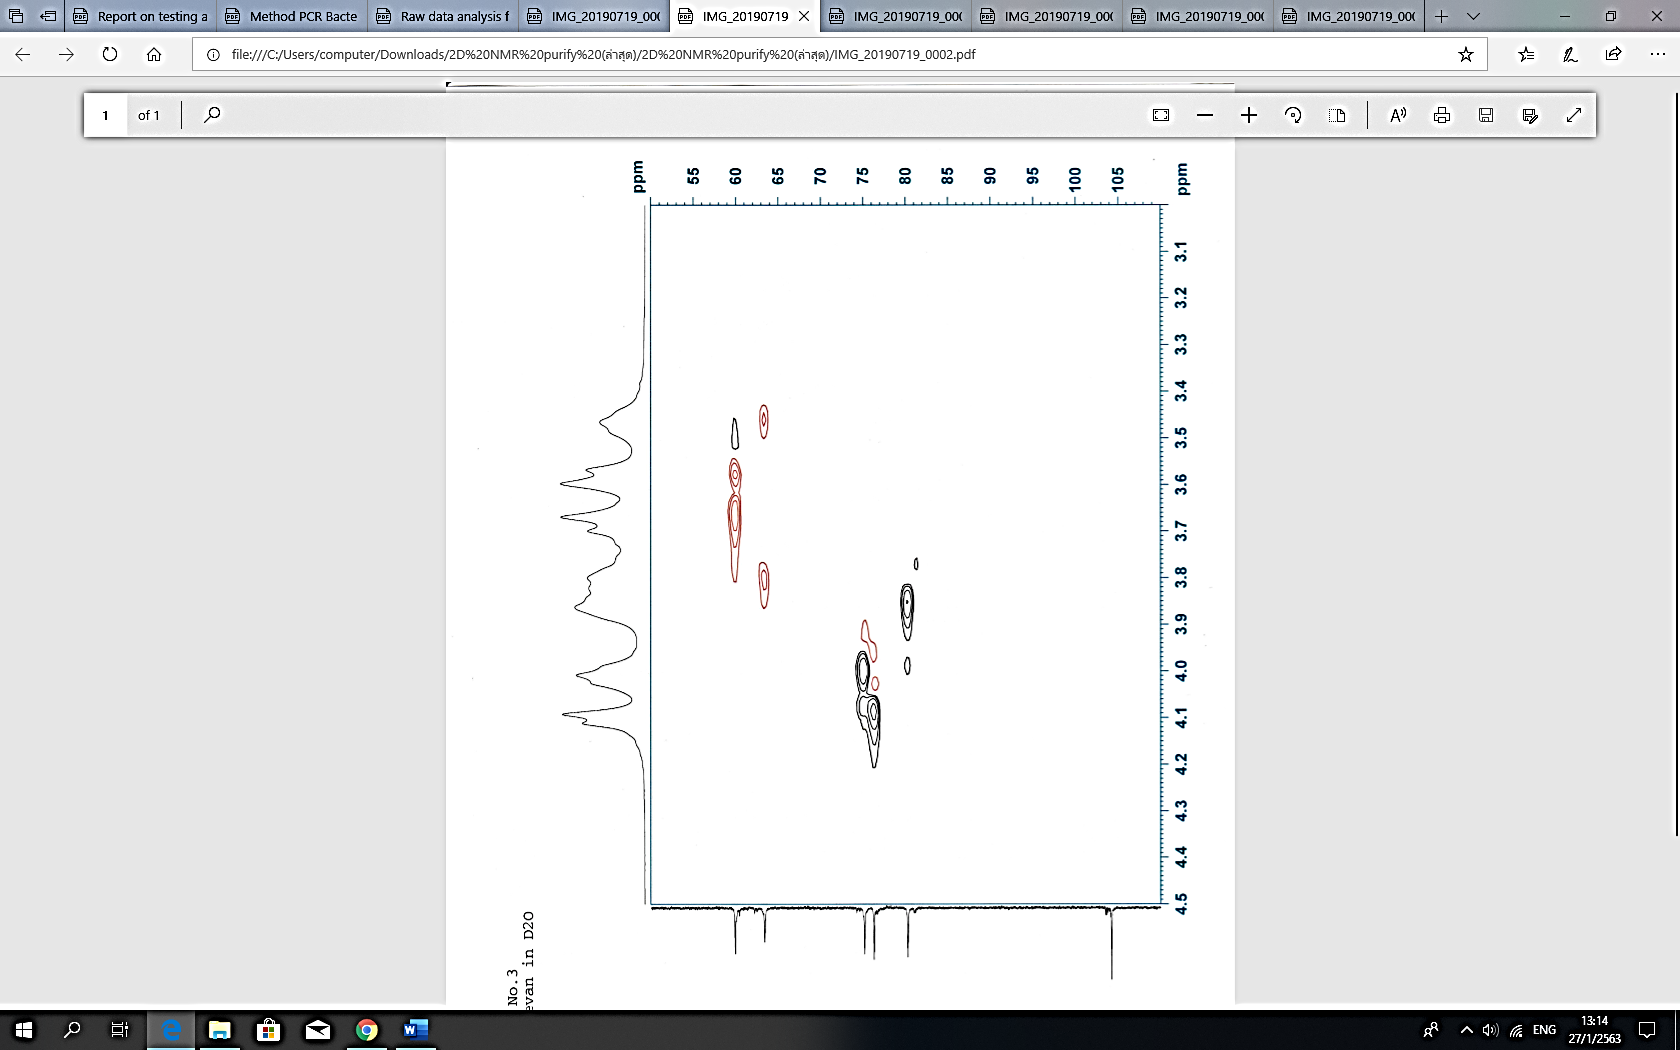


**Supplementary Figure 2.** The 2D NMR testing results of the levan product produced by strain B6. The HSQC spectrum in D2O of levan product from levansucrase of B-6 bacterial strain displays the direct connectivity between the 13C and 1H (*J*H/C) of the fructose residue of levan. (1st time)


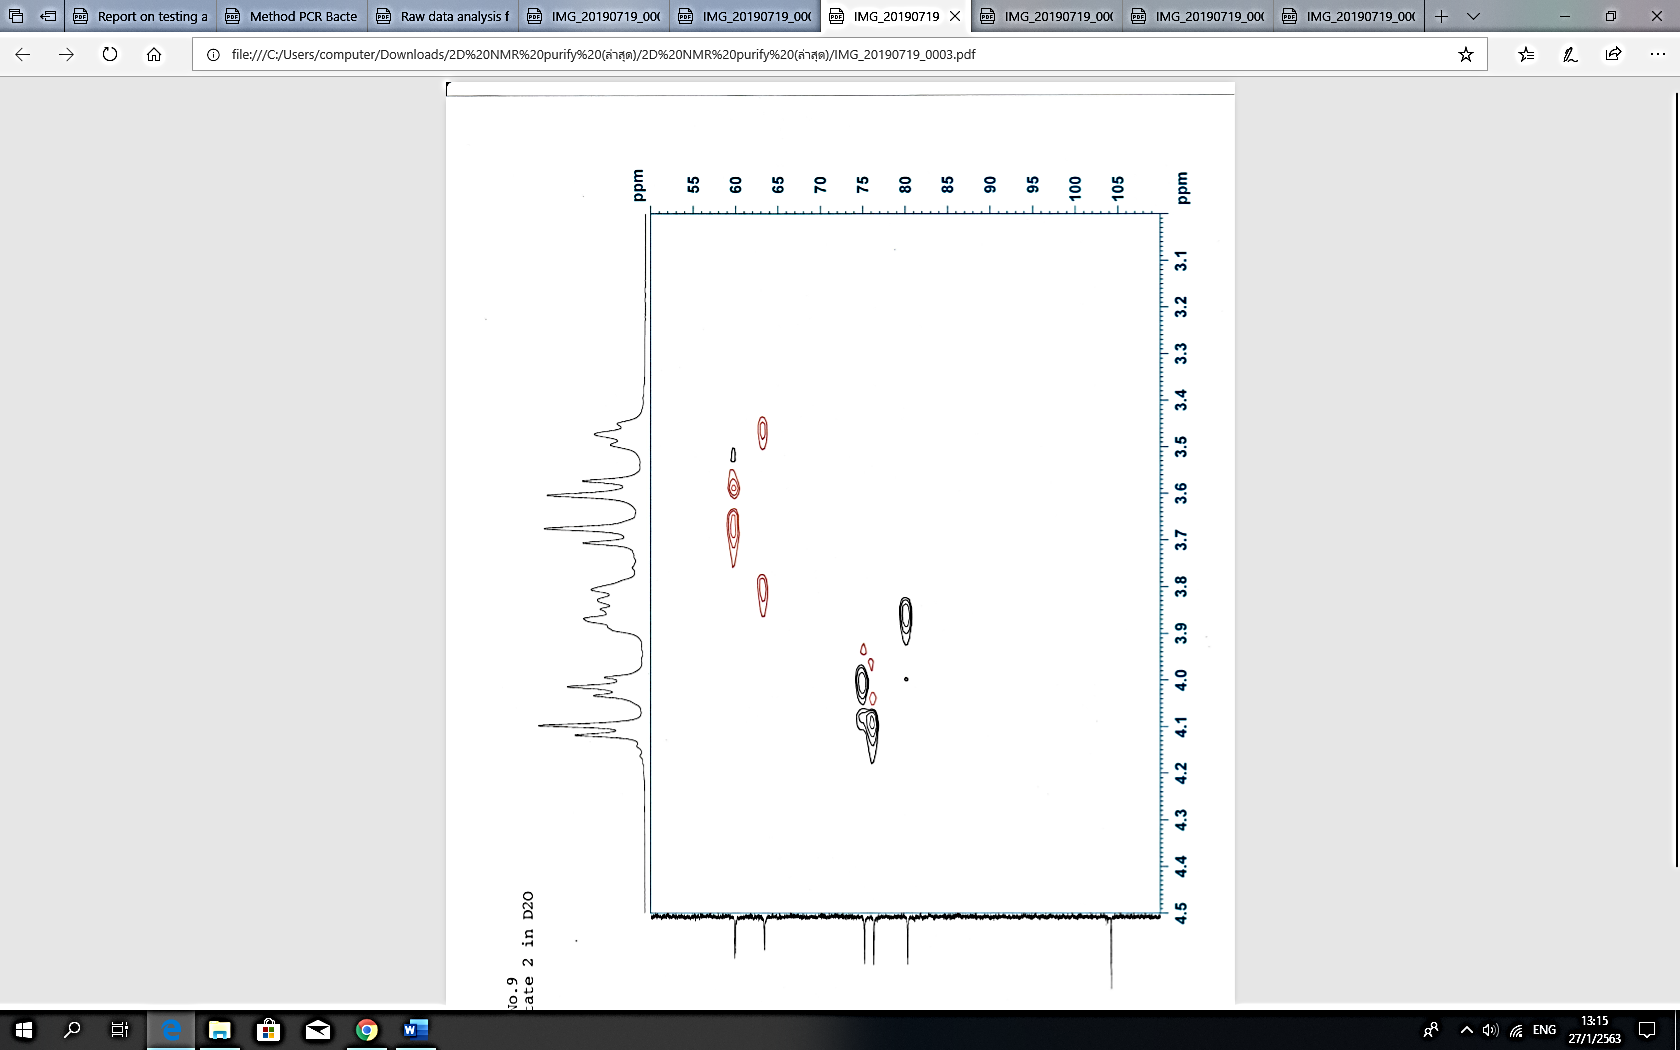


**Supplementary Figure 3.** The HSQC spectrum in of levan product from levansucrase of B-6 bacterial strain displays the direct connectivity between the 13C and 1H (*J*H/C) of the fructose residue of levan. (2nd time)


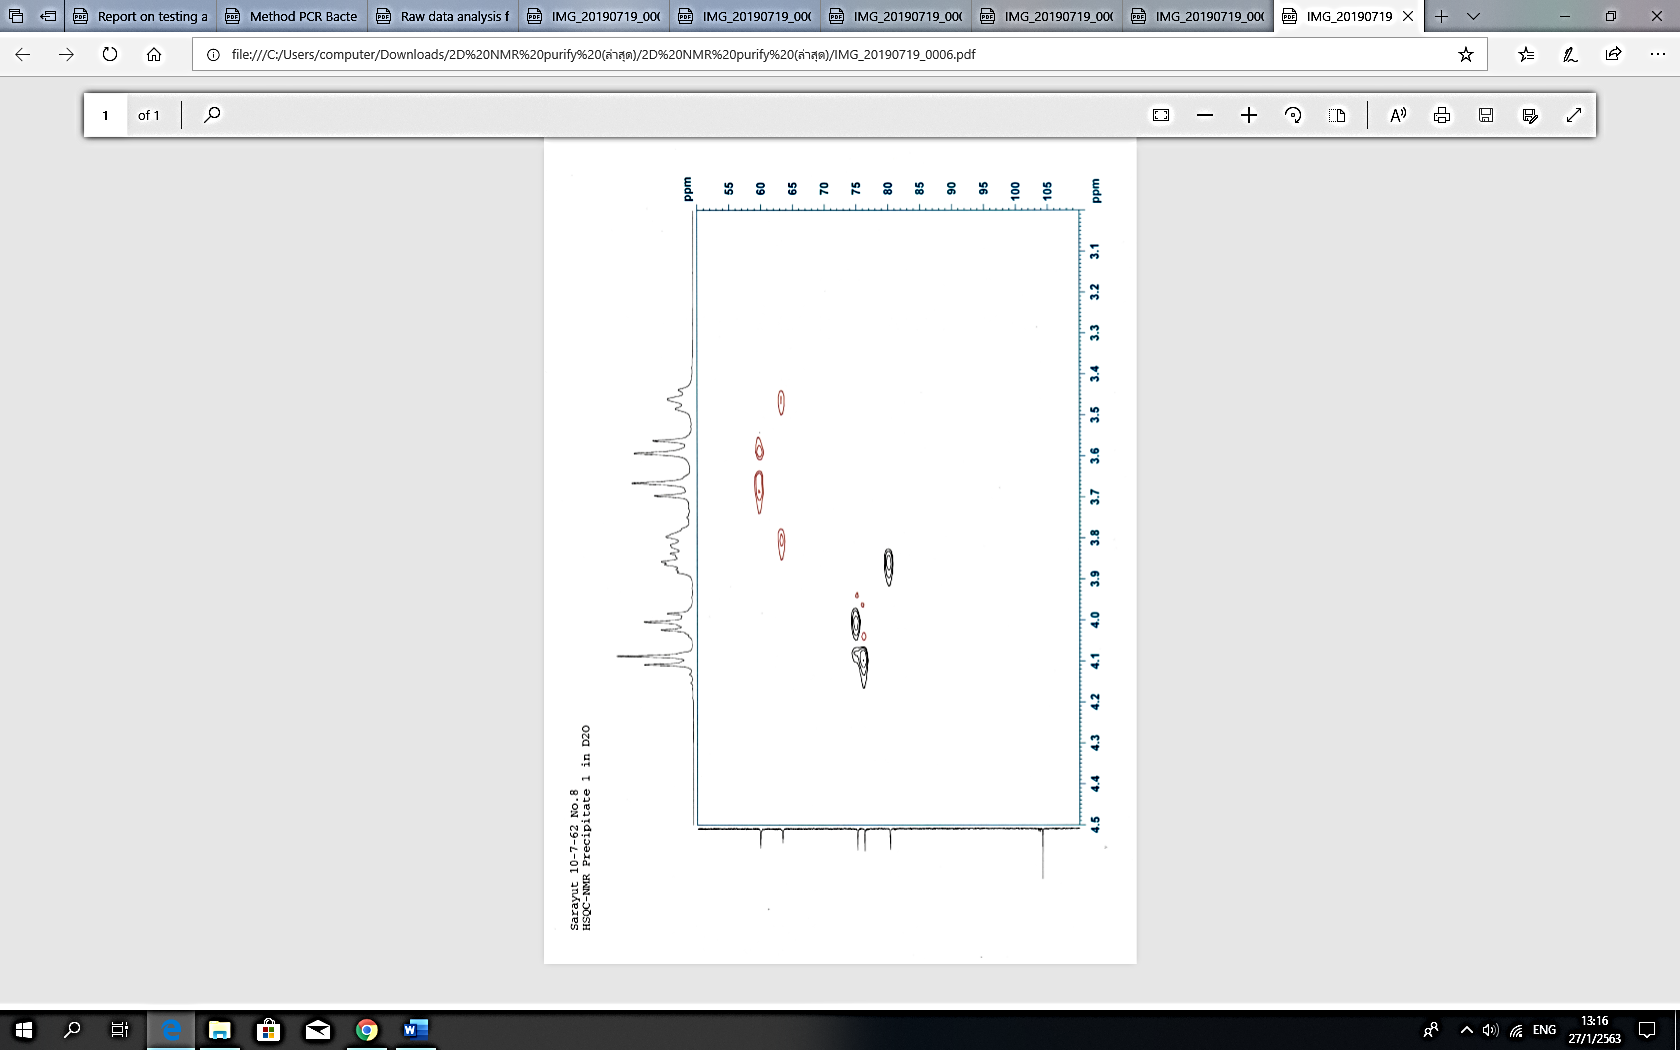


**Supplementary Figure 4.** The HSQC spectrum in D2O of levan product from levansucrase of B-6 bacterial strain displays the direct connectivity between the 13C and 1H (*J*H/C) of the fructose residue of levan. (3rd time)


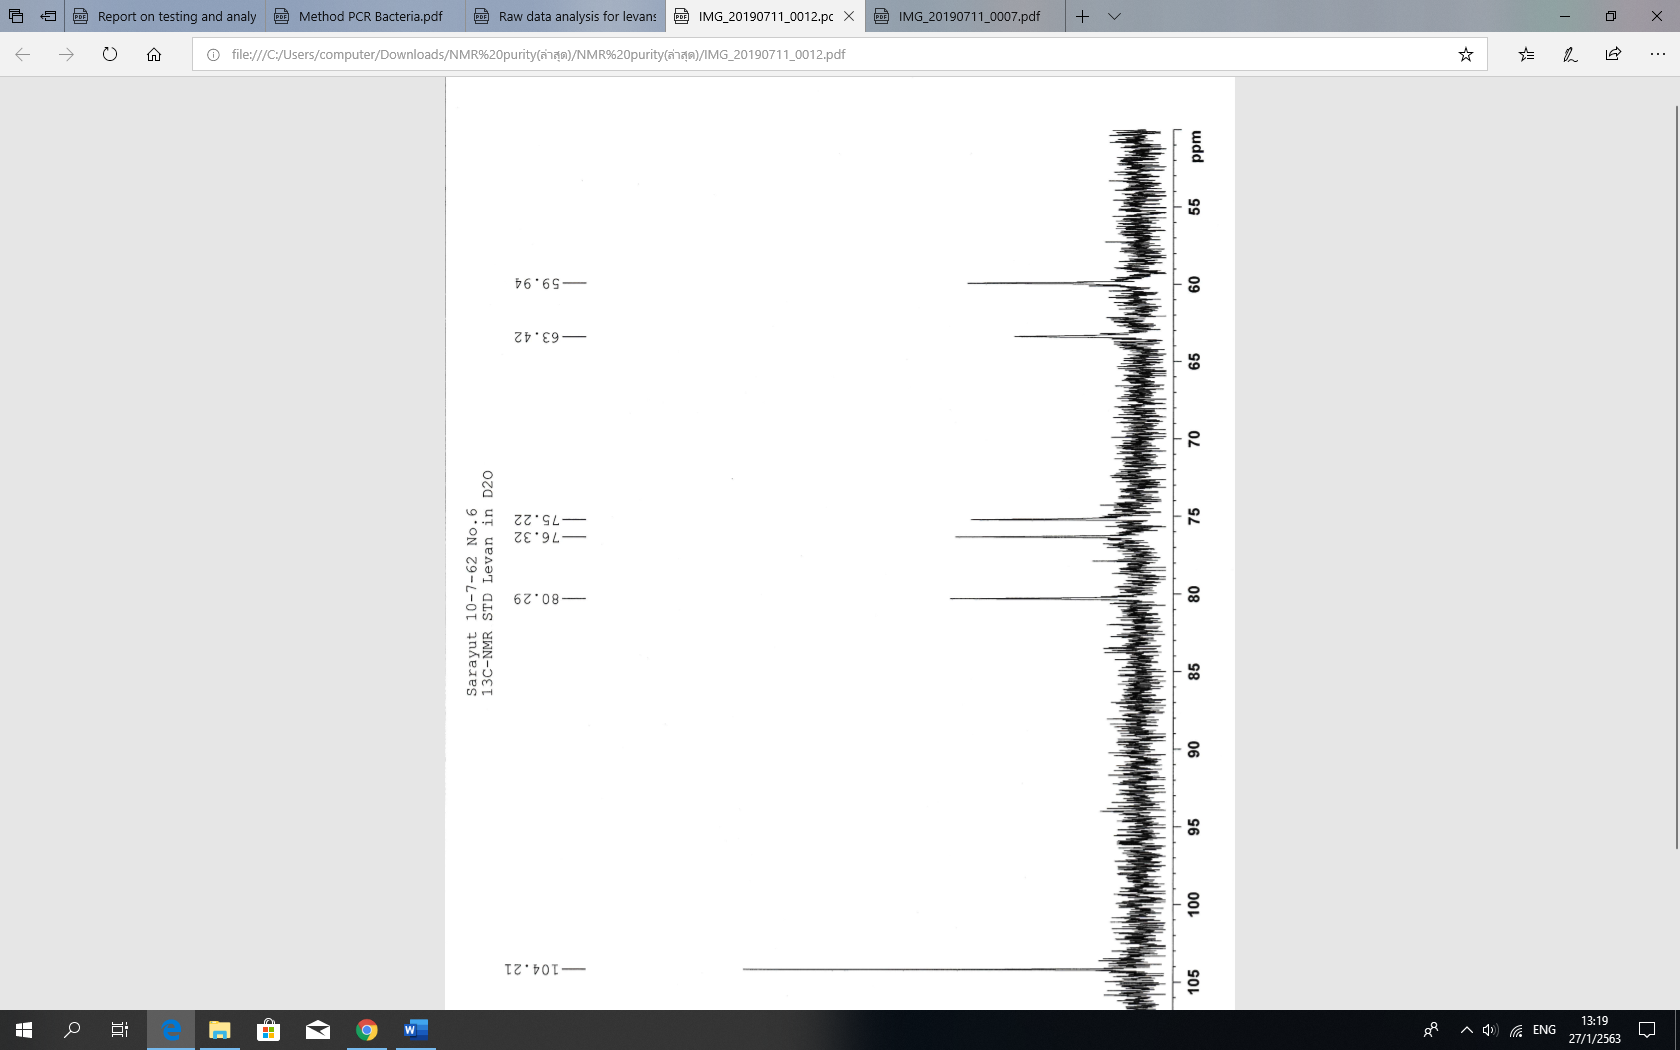


**Supplementary Figure 5.** The identification of levan produced from levansucrase of B-6 bacterial strain by 13C NMR spectrum levansucrase


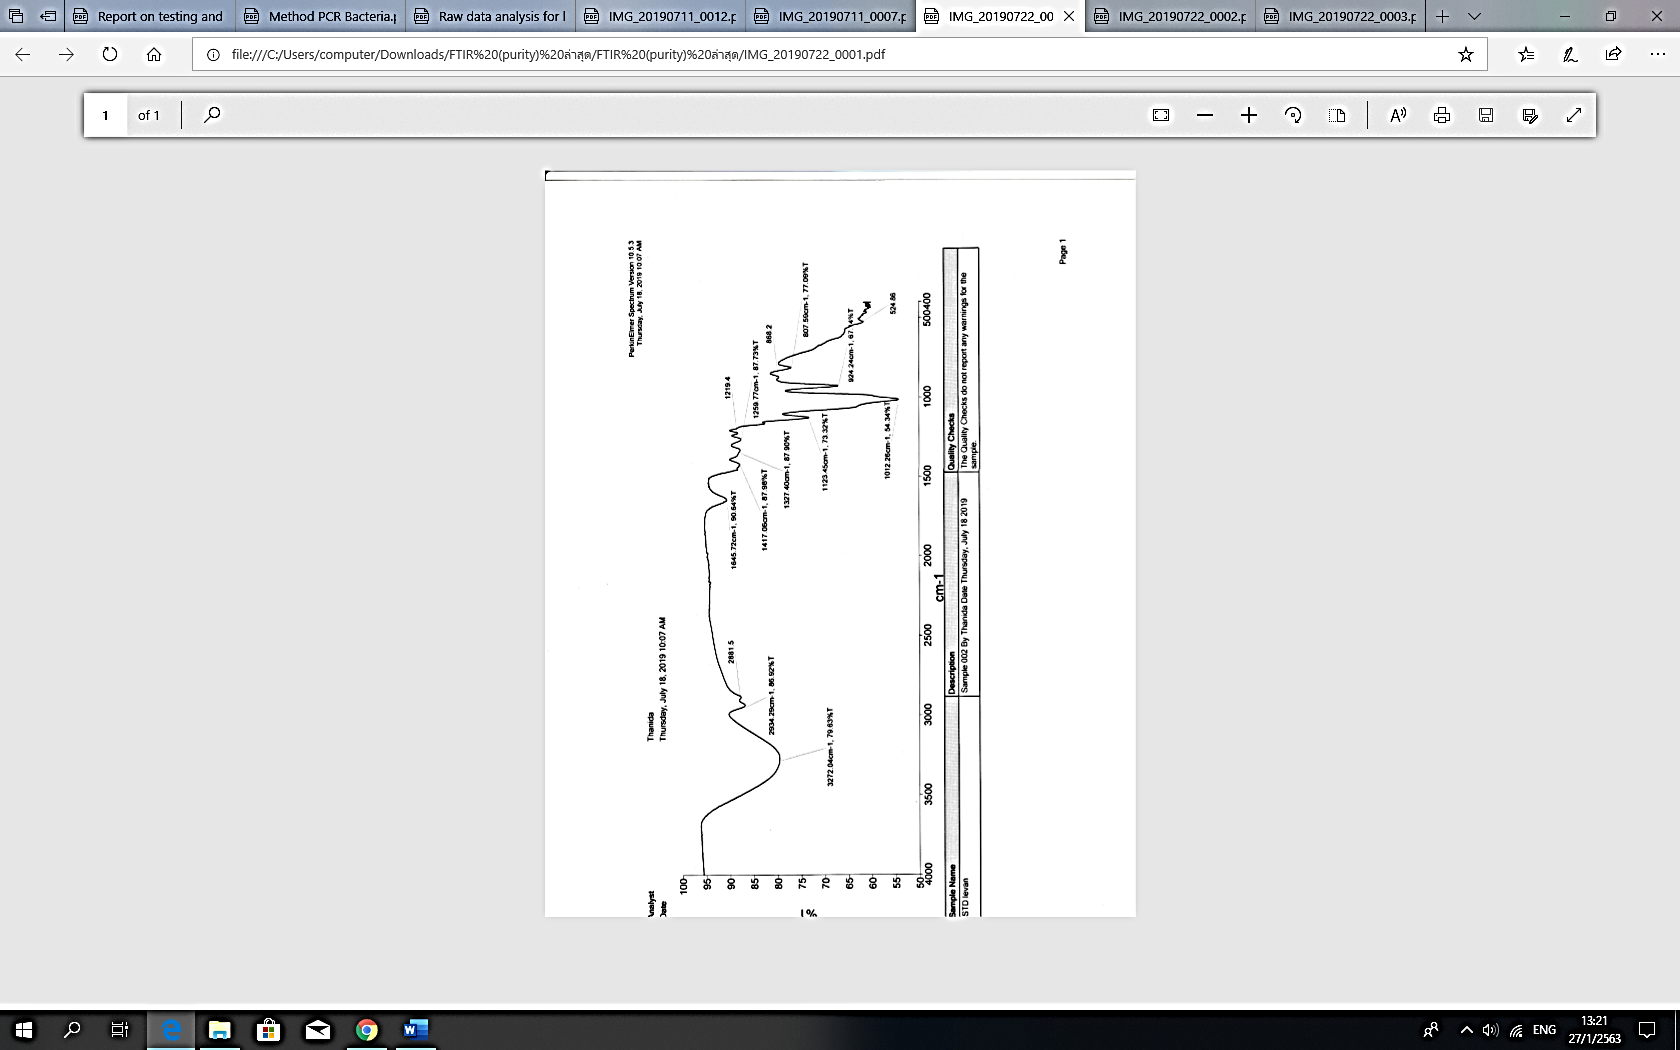


**Supplementary Figure 6.** The FTIR spectra of the reference standard levan (1st time)


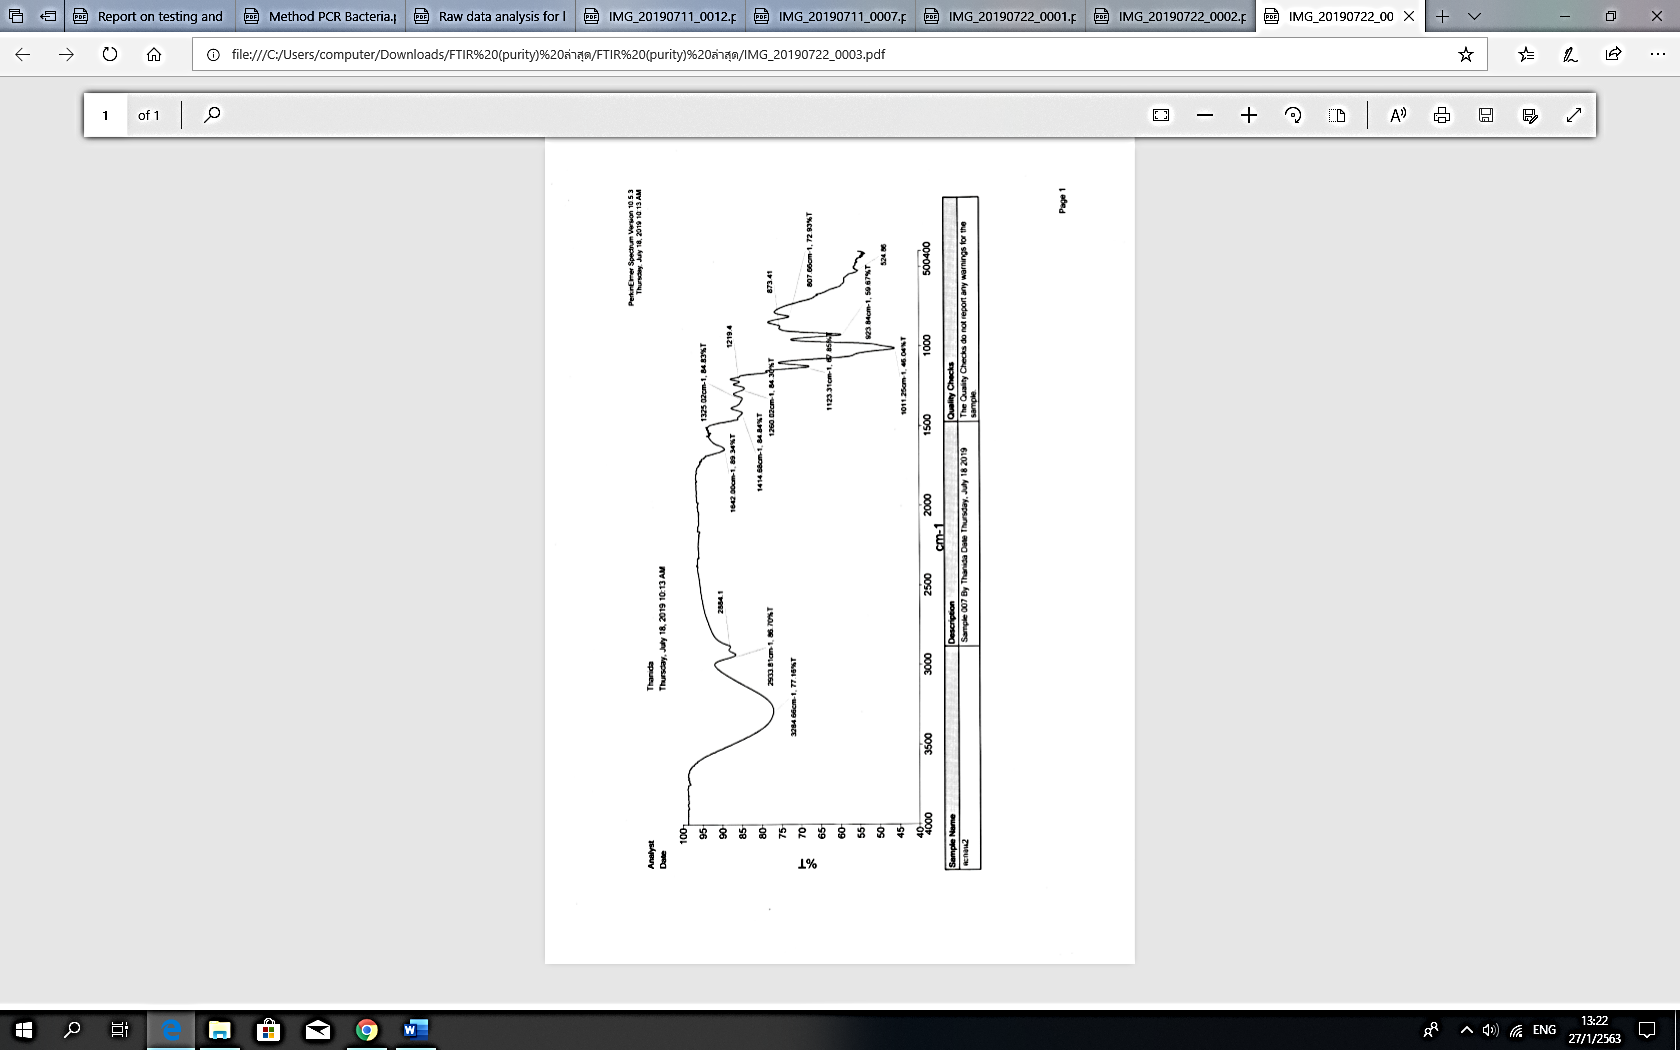


**Supplementary Figure 7.** The FTIR spectra of the levan produced from B-6 bacterial strain (2nd time)

**Supplementary Table 1.** DNS assay spectrophotometer readings of therelative sucrose hydrolysis of the nine bacterial strains isolated from fermented soybean.

| Isolated bacteria | UV540 absorption | | | Glucose Concentration (mg/ml) | | | | | % Relative sucrose hydrolyzed | | | | |
| --- | --- | --- | --- | --- | --- | --- | --- | --- | --- | --- | --- | --- | --- |
| 1 | 2 | 3 | 1 | 2 | 3 | average | S.D | 1 | 2 | 3 | average | S.D |
| B-1 | 4.552 | 4.555 | 4.545 | 32.75 | 32.77 | 32.70 | 32.74 | 0.04 | 65.51 | 65.55 | 65.40 | 65.49 | 0.08 |
| B-5 | 4.414 | 4.425 | 4.449 | 31.75 | 31.83 | 32.00 | 31.86 | 0.13 | 63.49 | 63.66 | 64.00 | 63.72 | 0.26 |
| B-6 | 4.058 | 4.073 | 4.065 | 29.15 | 29.26 | 29.20 | 29.20 | 0.05 | 58.30 | 58.52 | 58.41 | 58.41 | 0.11 |
| B-4 | 4.059 | 4.054 | 4.051 | 29.16 | 29.13 | 29.10 | 29.13 | 0.03 | 58.31 | 58.25 | 58.20 | 58.25 | 0.06 |
| B-2 | 4.037 | 4.028 | 4.031 | 29.00 | 28.93 | 28.95 | 28.96 | 0.03 | 58.00 | 57.86 | 57.90 | 57.92 | 0.07 |
| B-3 | 1.773 | 1.774 | 1.773 | 12.49 | 12.50 | 12.50 | 12.50 | 0.00 | 24.99 | 25.00 | 24.99 | 24.99 | 0.01 |
| B-7 | 0.566 | 0.566 | 0.566 | 3.70 | 3.69 | 3.69 | 3.69 | 0.00 | 7.39 | 7.39 | 7.39 | 7.39 | 0.00 |
| B-8 | 0.239 | 0.241 | 0.242 | 1.31 | 1.33 | 1.33 | 1.32 | 0.01 | 2.62 | 2.66 | 2.66 | 2.65 | 0.02 |
| B-9 | 0.101 | 0.100 | 0.096 | 0.31 | 0.30 | 0.27 | 0.29 | 0.02 | 0.62 | 0.60 | 0.54 | 0.59 | 0.04 |

**Supplementary Figure 8.** Results of the relative sucrose hydrolysis of the nine bacterial strains isolated from fermented soybean. The relative activity refers to the maximum activity.(*) Statistically significant difference with B-1

| time(h) | B-1 | | | | | B-5 | | | | | B-2 | | | | | B-4 | | | | | B-6 | | | | |
| --- | --- | --- | --- | --- | --- | --- | --- | --- | --- | --- | --- | --- | --- | --- | --- | --- | --- | --- | --- | --- | --- | --- | --- | --- | --- |
| UV540 absorption | | | | | UV540 absorption | | | | | UV540 absorption | | | | | UV540 absorption | | | | | UV540 absorption | | | | |
| 1 | 2 | 3 | average | S.D | 1 | 2 | 3 | average | S.D | 1 | 2 | 3 | average | S.D | 1 | 2 | 3 | average | S.D | 1 | 2 | 3 | average | S.D |
| 0 | 0.060 | 0.065 | 0.060 | 0.061 | 0.003 | 0.059 | 0.060 | 0.060 | 0.060 | 0.0004 | 0.060 | 0.059 | 0.060 | 0.060 | 0.0004 | 0.059 | 0.059 | 0.060 | 0.059 | 0.0004 | 0.059 | 0.059 | 0.060 | 0.059 | 0.0002 |
| 3 | 0.241 | 0.241 | 0.241 | 0.241 | 0.000 | 0.317 | 0.315 | 0.315 | 0.316 | 0.0010 | 0.061 | 0.061 | 0.062 | 0.061 | 0.0004 | 0.072 | 0.072 | 0.072 | 0.072 | 0.0003 | 0.282 | 0.282 | 0.283 | 0.282 | 0.0008 |
| 6 | 1.027 | 1.028 | 1.027 | 1.027 | 0.000 | 1.178 | 1.177 | 1.177 | 1.177 | 0.0004 | 0.117 | 0.116 | 0.116 | 0.116 | 0.0005 | 0.140 | 0.141 | 0.140 | 0.140 | 0.0003 | 0.867 | 0.866 | 0.867 | 0.866 | 0.0005 |
| 9 | 1.306 | 1.371 | 1.371 | 1.349 | 0.038 | 1.175 | 1.174 | 1.174 | 1.174 | 0.0003 | 0.373 | 0.333 | 0.372 | 0.359 | 0.0230 | 0.291 | 0.293 | 0.294 | 0.292 | 0.0013 | 1.198 | 1.200 | 1.200 | 1.199 | 0.0008 |
| 12 | 1.374 | 1.375 | 1.375 | 1.375 | 0.001 | 1.586 | 1.585 | 1.585 | 1.585 | 0.0006 | 0.759 | 0.762 | 0.771 | 0.764 | 0.0060 | 0.346 | 0.346 | 0.346 | 0.346 | 0.0005 | 1.320 | 1.320 | 1.320 | 1.320 | 0.0004 |
| 15 | 0.899 | 0.899 | 0.898 | 0.899 | 0.000 | 0.585 | 0.583 | 0.583 | 0.583 | 0.0012 | 0.901 | 0.901 | 0.900 | 0.901 | 0.0005 | 0.533 | 0.533 | 0.532 | 0.533 | 0.0004 | 1.107 | 1.107 | 1.106 | 1.107 | 0.0005 |
| 18 | 0.883 | 0.883 | 0.883 | 0.883 | 0.000 | 1.036 | 1.035 | 1.036 | 1.035 | 0.0002 | 0.729 | 0.730 | 0.729 | 0.729 | 0.0002 | 0.644 | 0.644 | 0.644 | 0.644 | 0.0002 | 1.344 | 1.344 | 1.346 | 1.345 | 0.0010 |
| 21 | 0.920 | 0.919 | 0.919 | 0.919 | 0.000 | 1.004 | 1.004 | 1.003 | 1.004 | 0.0003 | 0.619 | 0.619 | 0.619 | 0.619 | 0.0002 | 1.159 | 1.158 | 1.157 | 1.158 | 0.0010 | 1.267 | 1.266 | 1.266 | 1.266 | 0.0005 |
| 24 | 0.843 | 0.843 | 0.843 | 0.843 | 0.000 | 1.171 | 1.171 | 1.170 | 1.171 | 0.0003 | 0.814 | 0.815 | 0.814 | 0.814 | 0.0004 | 0.893 | 0.893 | 0.894 | 0.893 | 0.0004 | 1.144 | 1.143 | 1.144 | 1.144 | 0.0003 |
| time(h) | B-1 | | | | | B-5 | | | | | B-2 | | | | | B-4 | | | | | B-6 | | | | |
| Glucose Concentration (mg/ml) | | | | | Glucose Concentration (mg/ml) | | | | | Glucose Concentration (mg/ml) | | | | | Glucose Concentration (mg/ml) | | | |  | Glucose Concentration (mg/ml) | | | | |
| 1 | 2 | 3 | average | S.D | 1 | 2 | 3 | average | S.D | 1 | 2 | 3 | average | S.D | 1 | 2 | 3 | average | S.D | 1 | 2 | 3 | average | S.D |
| 0 | 0.05 | 0.43 | 0.07 | 0.18 | 0.213 | 0.02 | 0.07 | 0.07 | 0.06 | 0.029 | 0.06 | 0.02 | 0.07 | 0.05 | 0.026 | 0.02 | 0.01 | 0.06 | 0.03 | 0.026 | 0.03 | 0.03 | 0.05 | 0.04 | 0.013 |
| 3 | 13.25 | 13.27 | 13.27 | 13.26 | 0.008 | 18.81 | 18.69 | 18.69 | 18.73 | 0.072 | 0.15 | 0.15 | 0.20 | 0.17 | 0.028 | 0.93 | 0.96 | 0.95 | 0.95 | 0.019 | 16.23 | 16.28 | 16.34 | 16.28 | 0.055 |
| 6 | 70.55 | 70.61 | 70.58 | 70.58 | 0.029 | 81.56 | 81.52 | 81.51 | 81.53 | 0.030 | 4.22 | 4.17 | 4.16 | 4.18 | 0.034 | 5.94 | 5.95 | 5.90 | 5.93 | 0.023 | 58.87 | 58.81 | 58.88 | 58.85 | 0.036 |
| 9 | 90.91 | 95.67 | 95.63 | 94.07 | 2.736 | 81.34 | 81.30 | 81.32 | 81.32 | 0.018 | 22.88 | 19.96 | 22.84 | 21.89 | 1.673 | 16.93 | 17.03 | 17.11 | 17.02 | 0.091 | 83.06 | 83.15 | 83.16 | 83.12 | 0.055 |
| 12 | 95.87 | 95.92 | 95.95 | 95.91 | 0.037 | 111.31 | 111.27 | 111.23 | 111.27 | 0.040 | 51.06 | 51.22 | 51.89 | 51.39 | 0.438 | 20.96 | 20.89 | 20.91 | 20.92 | 0.033 | 91.96 | 91.92 | 91.90 | 91.93 | 0.030 |
| 15 | 61.26 | 61.23 | 61.20 | 61.23 | 0.033 | 38.33 | 38.20 | 38.17 | 38.23 | 0.085 | 61.39 | 61.36 | 61.32 | 61.35 | 0.033 | 34.55 | 34.53 | 34.49 | 34.52 | 0.026 | 76.43 | 76.38 | 76.36 | 76.39 | 0.037 |
| 18 | 60.07 | 60.08 | 60.06 | 60.07 | 0.011 | 71.19 | 71.18 | 71.20 | 71.19 | 0.011 | 48.88 | 48.88 | 48.86 | 48.87 | 0.015 | 42.65 | 42.63 | 42.64 | 42.64 | 0.011 | 93.69 | 93.69 | 93.81 | 93.73 | 0.070 |
| 21 | 62.76 | 62.71 | 62.70 | 62.72 | 0.030 | 68.88 | 68.88 | 68.84 | 68.87 | 0.025 | 40.82 | 40.81 | 40.79 | 40.81 | 0.015 | 80.21 | 80.08 | 80.08 | 80.12 | 0.074 | 88.04 | 87.98 | 87.99 | 88.00 | 0.036 |
| 24 | 57.17 | 57.17 | 57.16 | 57.17 | 0.007 | 81.05 | 81.05 | 81.01 | 81.04 | 0.025 | 55.07 | 55.09 | 55.04 | 55.07 | 0.026 | 60.80 | 60.83 | 60.85 | 60.83 | 0.029 | 79.10 | 79.06 | 79.09 | 79.08 | 0.023 |
| time(h) | B-1 | | | | | B-5 | | | | | B-2 | | | | | B-4 | | | | | B-6 | | | | |
| Enzyme activity (IU/mL) | | | | | Enzyme activity (IU/mL) | | | | | Enzyme activity (IU/mL) | | | | | Enzyme activity (IU/mL) | | | | | Enzyme activity (IU/mL) | | | | |
| 1 | 2 | 3 | average | S.D | 1 | 2 | 3 | average | S.D | 1 | 2 | 3 | average | S.D | 1 | 2 | 3 | average | S.D | 1 | 2 | 3 | average | S.D |
| 0 | 0.01 | 0.08 | 0.01 | 0.03 | 0.039 | 0.00 | 0.01 | 0.01 | 0.01 | 0.005 | 0.01 | 0.00 | 0.01 | 0.01 | 0.005 | 0.00 | 0.00 | 0.01 | 0.01 | 0.005 | 0.01 | 0.01 | 0.01 | 0.01 | 0.002 |
| 3 | 2.45 | 2.46 | 2.46 | 2.46 | 0.002 | 3.48 | 3.46 | 3.46 | 3.47 | 0.013 | 0.03 | 0.03 | 0.04 | 0.03 | 0.005 | 0.17 | 0.18 | 0.18 | 0.18 | 0.004 | 3.00 | 3.01 | 3.03 | 3.01 | 0.010 |
| 6 | 13.06 | 13.08 | 13.07 | 13.07 | 0.005 | 15.10 | 15.10 | 15.09 | 15.10 | 0.006 | 0.78 | 0.77 | 0.77 | 0.77 | 0.006 | 1.10 | 1.10 | 1.09 | 1.10 | 0.004 | 10.90 | 10.89 | 10.90 | 10.90 | 0.007 |
| 9 | 16.84 | 17.72 | 17.71 | 17.42 | 0.507 | 15.06 | 15.06 | 15.06 | 15.06 | 0.003 | 4.24 | 3.70 | 4.23 | 4.05 | 0.310 | 3.13 | 3.15 | 3.17 | 3.15 | 0.017 | 15.38 | 15.40 | 15.40 | 15.39 | 0.010 |
| 12 | 17.75 | 17.76 | 17.77 | 17.76 | 0.007 | 20.61 | 20.61 | 20.60 | 20.61 | 0.007 | 9.46 | 9.48 | 9.61 | 9.52 | 0.081 | 3.88 | 3.87 | 3.87 | 3.87 | 0.006 | 17.03 | 17.02 | 17.02 | 17.02 | 0.006 |
| 15 | 11.34 | 11.34 | 11.33 | 11.34 | 0.006 | 7.10 | 7.07 | 7.07 | 7.08 | 0.016 | 11.37 | 11.36 | 11.36 | 11.36 | 0.006 | 6.40 | 6.39 | 6.39 | 6.39 | 0.005 | 14.15 | 14.14 | 14.14 | 14.15 | 0.007 |
| 18 | 11.12 | 11.13 | 11.12 | 11.12 | 0.002 | 13.18 | 13.18 | 13.18 | 13.18 | 0.002 | 9.05 | 9.05 | 9.05 | 9.05 | 0.003 | 7.90 | 7.89 | 7.90 | 7.90 | 0.002 | 17.35 | 17.35 | 17.37 | 17.36 | 0.013 |
| 21 | 11.62 | 11.61 | 11.61 | 11.62 | 0.006 | 12.76 | 12.76 | 12.75 | 12.75 | 0.005 | 7.56 | 7.56 | 7.55 | 7.56 | 0.003 | 14.85 | 14.83 | 14.83 | 14.84 | 0.014 | 16.30 | 16.29 | 16.29 | 16.30 | 0.007 |
| 24 | 10.59 | 10.59 | 10.58 | 10.59 | 0.001 | 15.01 | 15.01 | 15.00 | 15.01 | 0.005 | 10.20 | 10.20 | 10.19 | 10.20 | 0.005 | 11.26 | 11.26 | 11.27 | 11.26 | 0.005 | 14.65 | 14.64 | 14.65 | 14.65 | 0.004 |

**Supplementary Table 2.** Determination of the enzyme activity concentration of reducing sugar by DNS method.
